# Supplementary material
Source: PubMed Central journal article supplement (PMC3157189)

# Kobayashi et al. Supplemental Figure 1

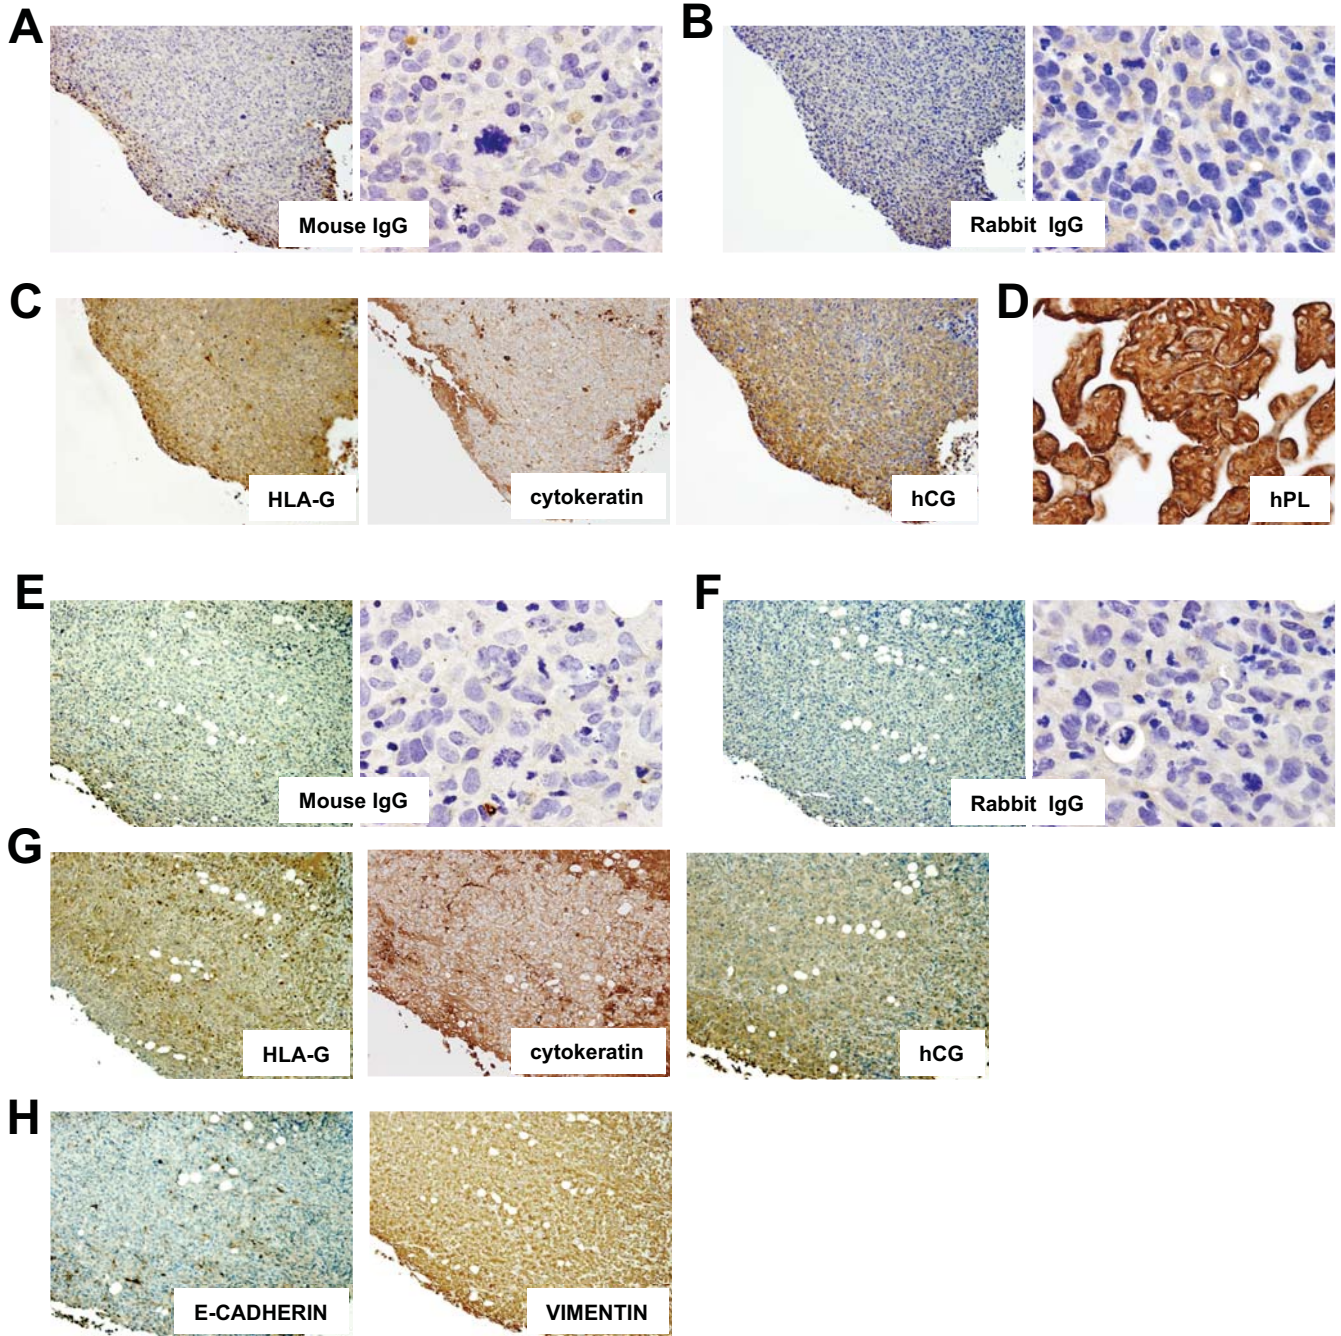

Supplement: mmc1.pdf [file mmc1.pdf]

# Kobayashi et al.

## Supplemental Figure 2

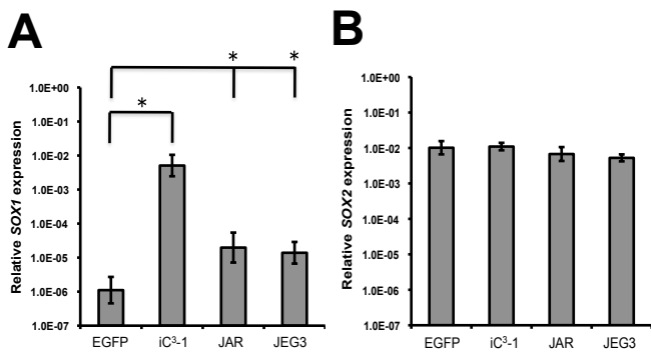

Supplement: mmc2.pdf [file mmc2.pdf]
